# Supplementary material for: Conformational preferences of the 2-methylproline residue and its role in stabilizing β-turn and polyproline II structures of peptides
Source: Royal Society of Chemistry journal article supplement (doi:10.1039/c4nj00072b), 2014-01-01
Supplement: c4nj00072b1.pdf [file c4nj00072b1.pdf]

## Supplementary information

# Conformational preferences of the 2-methylproline residue and its role in stabilizing $\beta$ -turn and polyproline II structures of peptides

Young Kee Kang<sup>\*a</sup> and Hae Sook Park<sup>b</sup>

---

<sup>a</sup> Department of Chemistry and BK21 PLUS Research Team, Chungbuk National University, Cheongju, Chungbuk 361-763, Republic of Korea. E-mail: ykkang@chungbuk.ac.kr; Fax: +82-43-273-2991; Tel: +82-43-261-2285

<sup>b</sup> Department of Nursing, Cheju Halla University, Cheju 690-708, Republic of Korea.

| Page  | Contents                                                                                                                                                                                                                                            |
|-------|-----------------------------------------------------------------------------------------------------------------------------------------------------------------------------------------------------------------------------------------------------|
| s1    | Table of Contents                                                                                                                                                                                                                                   |
| s2–s3 | <b>Table S1</b> Torsion angles, puckering parameters, and thermodynamic properties of local minima and transition states for Ac-Ala-Pro-NHMe at the M06-2X/cc-pVTZ//SMD M06-2X/6-31+G(d) level of theory in water                                   |
| s4–s5 | Optimized Cartesian coordinates of P <sub>II</sub> structures of Ac-(Pro) <sub>2</sub> -(2-MePro)-(Pro) <sub>2</sub> -NMe <sub>2</sub> and Ac-(Hyp-Gly-2-MePro)-(Hyp-Gly-Pro)-NMe <sub>2</sub> at the SMD M06-2X/6-31+G(d) level of theory in water |

**Table S1 Torsion angles, puckering parameters, and thermodynamic properties of local minima and transition states for Ac-Ala-Pro-NHMe at the M06-2X/cc-pVTZ//SMD M06-2X/6-31+G(d) level of theory in water<sup>a</sup>**

| Conf.     | Turn type | Backbone torsion angles <sup>b</sup> |          |            |          |          |            | Endocyclic torsion angles <sup>b</sup> |          |          |          |          | Therm. properties |                      |                    |                |                |       |
|-----------|-----------|--------------------------------------|----------|------------|----------|----------|------------|----------------------------------------|----------|----------|----------|----------|-------------------|----------------------|--------------------|----------------|----------------|-------|
|           |           | $\phi_1$                             | $\psi_1$ | $\omega_1$ | $\phi_2$ | $\psi_2$ | $\omega_2$ | $\chi^0$                               | $\chi^1$ | $\chi^2$ | $\chi^3$ | $\chi^4$ | $\Delta E_e^c$    | $\Delta\Delta G_s^d$ | $\Delta E_{e,w}^e$ | $\Delta H_w^f$ | $\Delta G_w^g$ | $p^h$ |
| FtFu      |           | -60.2                                | 150.2    | 167.3      | -51.2    | 147.1    | 175.8      | 3.7                                    | -26.2    | 38.8     | -35.9    | 20.3     | 7.43              | -6.95                | 0.48               | 0.72           | 0.00           | 29.1  |
| EtAd      |           | -159.8                               | 153.9    | 174.8      | -71.1    | -18.6    | -179.9     | -10.5                                  | 29.6     | -38.0    | 31.1     | -13.0    | 4.85              | -2.86                | 2.00               | 1.87           | 0.28           | 18.3  |
| EtFu      |           | -159.6                               | 157.5    | 169.9      | -53.0    | 146.2    | 178.1      | 2.5                                    | -25.6    | 38.7     | -36.5    | 21.5     | 4.47              | -3.03                | 1.44               | 1.53           | 0.28           | 18.1  |
| FcAd      | Vla1      | -54.6                                | 144.9    | 5.1        | -88.5    | 11.0     | 174.4      | -20.4                                  | 37.0     | -40.4    | 27.9     | -4.6     | 0.00              | 0.00                 | 0.00               | 0.00           | 0.43           | 14.0  |
| AtFu      |           | -56.7                                | -39.4    | -179.5     | -56.3    | 145.0    | 175.3      | 5.6                                    | -28.0    | 39.9     | -35.9    | 19.1     | 14.39             | -12.87               | 1.52               | 1.72           | 0.97           | 5.7   |
| EcFd      | Vlb       | -159.3                               | 155.0    | -11.7      | -68.1    | 163.8    | 176.9      | -20.1                                  | 35.3     | -38.1    | 25.8     | -3.5     | 5.07              | -2.83                | 2.24               | 2.35           | 1.43           | 2.6   |
| EtAu      |           | -162.0                               | 166.3    | 175.2      | -67.1    | -21.1    | -178.1     | -3.9                                   | -20.7    | 36.9     | -38.6    | 26.9     | 5.31              | -2.83                | 2.48               | 1.73           | 1.44           | 2.5   |
| FtAu      |           | -61.4                                | 153.1    | 170.9      | -60.6    | -27.6    | -177.2     | 0.4                                    | -23.1    | 36.8     | -35.9    | 22.4     | 9.71              | -7.93                | 1.78               | 2.08           | 1.58           | 2.0   |
| EcFu      | Vlb       | -161.4                               | 153.9    | -17.1      | -55.3    | 162.9    | 176.8      | -0.8                                   | -22.7    | 37.1     | -36.8    | 23.8     | 6.18              | -3.29                | 2.89               | 2.85           | 1.74           | 1.5   |
| AtAu      | I         | -52.7                                | -35.9    | 178.7      | -64.8    | -18.7    | -177.7     | -0.1                                   | -23.4    | 37.7     | -37.2    | 23.5     | 5.34              | -4.56                | 0.79               | 1.01           | 1.83           | 1.3   |
| EcAd      | Vla2      | -159.4                               | 148.8    | -3.1       | -78.3    | -10.5    | -179.4     | -18.3                                  | 34.3     | -38.2    | 26.9     | -5.3     | 4.07              | -1.34                | 2.74               | 2.63           | 1.90           | 1.2   |
| A*tFd     |           | 47.5                                 | 50.8     | 177.7      | -60.7    | 145.4    | 175.7      | -5.8                                   | 27.1     | -38.1    | 33.9     | -17.8    | 9.96              | -7.68                | 2.28               | 2.41           | 1.96           | 1.1   |
| AtAd      | I         | -49.7                                | -42.0    | -176.2     | -86.3    | 3.0      | 179.7      | -24.4                                  | 36.5     | -35.8    | 21.2     | 2.2      | 5.30              | -3.28                | 2.02               | 1.97           | 2.13           | 0.8   |
| AtFd      |           | -54.9                                | -53.6    | -179.5     | -65.3    | 148.4    | 176.9      | -8.3                                   | 28.7     | -38.3    | 32.7     | -15.3    | 14.72             | -11.38               | 3.34               | 3.63           | 2.50           | 0.4   |
| FcAu      | Vla1      | -54.5                                | 146.8    | 1.7        | -73.5    | -7.7     | 175.5      | 0.8                                    | -24.1    | 38.0     | -37.0    | 22.8     | 2.22              | -0.32                | 1.90               | 2.10           | 2.68           | 0.3   |
| DcAd      |           | -129.0                               | 59.3     | 3.5        | -93.4    | -10.2    | -178.8     | -21.7                                  | 36.0     | -37.7    | 24.5     | -1.6     | 4.65              | -2.18                | 2.48               | 2.45           | 2.79           | 0.3   |
| EtCd      |           | -160.7                               | 153.3    | -178.5     | -85.0    | 59.5     | 179.4      | -16.7                                  | 34.8     | -40.6    | 29.9     | -8.3     | 0.05              | 3.21                 | 3.27               | 3.37           | 2.95           | 0.2   |
| DtAd      |           | -125.9                               | 62.5     | -179.6     | -67.4    | -22.4    | -179.3     | -9.7                                   | 29.8     | -38.9    | 32.4     | -14.3    | 7.05              | -3.71                | 3.34               | 3.43           | 3.06           | 0.2   |
| A*cA<br>d |           | 53.8                                 | 54.0     | 7.6        | -98.0    | -12.1    | -175.3     | -20.7                                  | 36.0     | -38.5    | 25.9     | -3.1     | 4.25              | -2.49                | 1.76               | 1.89           | 3.15           | 0.1   |
| EcAu      | Vla2      | -158.4                               | 149.6    | -8.9       | -67.1    | -19.5    | -176.6     | -4.4                                   | -19.8    | 35.9     | -37.8    | 26.7     | 5.49              | -1.42                | 4.07               | 4.07           | 3.20           | 0.1   |
| A*cF<br>d |           | 52.2                                 | 55.9     | 4.0        | -92.9    | 161.5    | 173.2      | -22.8                                  | 36.8     | -37.8    | 24.0     | -0.5     | 12.05             | -10.48               | 1.56               | 1.15           | 3.52           | 0.1   |
| F*cA<br>d |           | 77.8                                 | 150.6    | -5.6       | -84.4    | -3.1     | -178.6     | -22.8                                  | 36.6     | -37.5    | 23.7     | -0.4     | 12.91             | -6.74                | 6.17               | 6.32           | 4.42           | 0.0   |
| F*tAu     | II'       | 70.0                                 | 176.0    | 177.5      | -66.0    | -21.7    | -178.3     | 0.5                                    | -24.2    | 38.4     | -37.4    | 23.3     | 13.32             | -8.09                | 5.23               | 5.32           | 4.63           | 0.0   |
| AtCd      |           | -56.7                                | -43.0    | -171.1     | -89.2    | 62.4     | -177.3     | -22.2                                  | 35.9     | -37.1    | 23.4     | -0.7     | 5.73              | -1.22                | 4.51               | 4.68           | 4.63           | 0.0   |

|      |       |       |       |        |       |        |       |       |       |       |       |       |       |       |       |       |     |
|------|-------|-------|-------|--------|-------|--------|-------|-------|-------|-------|-------|-------|-------|-------|-------|-------|-----|
| AcFu | -72.2 | -9.5  | -9.5  | -47.5  | 157.4 | -172.6 | 9.7   | -30.7 | 40.1  | -33.8 | 15.1  | 9.21  | -5.23 | 3.98  | 4.15  | 4.77  | 0.0 |
| ts1  | -59.9 | 153.5 | 117.5 | -126.0 | 1.0   | 178.1  | -10.3 | 32.1  | -41.3 | 35.5  | -15.7 | 20.88 | 0.74  | 21.61 | 20.38 | 20.20 |     |

<sup>a</sup> At the SMD M06-2X/6-31+G\*(d) level of theory in water, all optimized structures and their solvation free energies as well as enthalpic and entropic terms are taken from ref. 41. Only the conformers with  $\Delta G_w < 5$  kcal/mol are listed. <sup>b</sup> Units in degrees. <sup>c</sup> Relative single-point electronic energies (kcal/mol) at the M06-2X/cc-pVTZ level of theory, which are newly calculated in this work. <sup>d</sup> Relative solvation free energies (kcal/mol) in water. <sup>e</sup> Relative electronic energies (kcal/mol) obtained by the sum of  $\Delta E_e$  and  $\Delta \Delta G_s$  in water. <sup>f</sup> Relative enthalpies (kcal/mol) at 25 °C in water. <sup>g</sup> Relative Gibbs free energies (kcal/mol) at 25 °C in water. <sup>h</sup> Population (%) for each local minimum calculated by its  $\Delta G_w$  in water.

**Optimized Cartesian coordinates of P<sub>II</sub> structures of Ac-(Pro)<sub>2</sub>-(2-MePro)-(Pro)<sub>2</sub>-NMe<sub>2</sub> and Ac-(Hyp-Gly-2-MePro)-(Hyp-Gly-Pro)-NMe<sub>2</sub> at the SMD M06-2X/6-31+G(d) level of theory in water:**

**Ac-(Pro)<sub>2</sub>-(2-MePro)-(Pro)<sub>2</sub>-NMe<sub>2</sub>**

*E* = -1950.1703308 Hartrees

|   |           |           |           |   |           |           |           |
|---|-----------|-----------|-----------|---|-----------|-----------|-----------|
| H | -9.378615 | 0.080592  | 2.031993  | N | 1.669874  | 1.751197  | -0.558138 |
| H | -9.520865 | 0.911491  | 0.455774  | C | 1.813899  | 3.208488  | -0.355768 |
| H | -8.387425 | 1.514156  | 1.674544  | C | 2.788627  | 1.192537  | -1.319141 |
| C | -8.832229 | 0.607390  | 1.249018  | H | 2.411321  | 0.543382  | -2.112458 |
| O | -7.405449 | -1.332361 | 1.314726  | C | 3.511160  | 2.434735  | -1.866348 |
| C | -7.743238 | -0.287802 | 0.722595  | C | 3.707112  | 0.394764  | -0.392744 |
| N | -7.139762 | 0.082786  | -0.419619 | O | 3.789663  | 0.652681  | 0.820068  |
| C | -7.317375 | 1.373939  | -1.108169 | H | 4.573924  | 2.249598  | -2.045107 |
| C | -6.007155 | -0.678739 | -0.928950 | H | 3.044536  | 2.730117  | -2.811359 |
| H | -6.295553 | -1.720782 | -1.089017 | C | 3.254514  | 3.484835  | -0.784617 |
| C | -5.662765 | 0.046701  | -2.244055 | H | 3.933961  | 3.331249  | 0.059698  |
| C | -4.835492 | -0.612672 | 0.050244  | H | 3.378609  | 4.507034  | -1.148538 |
| O | -4.707880 | 0.329959  | 0.850004  | H | 1.636178  | 3.485636  | 0.683407  |
| H | -4.611636 | -0.070978 | -2.521082 | H | 1.102923  | 3.743761  | -0.992907 |
| H | -6.283490 | -0.364275 | -3.046437 | N | 4.438052  | -0.573153 | -0.962210 |
| C | -6.047719 | 1.500073  | -1.951020 | C | 4.529724  | -0.866980 | -2.405807 |
| H | -5.259177 | 1.988280  | -1.369661 | C | 5.440811  | -1.282104 | -0.177413 |
| H | -6.218480 | 2.082258  | -2.859072 | H | 4.969491  | -1.702020 | 0.712937  |
| H | -7.422896 | 2.183617  | -0.382525 | C | 5.940432  | -2.361972 | -1.153765 |
| H | -8.215708 | 1.341468  | -1.734548 | C | 6.573449  | -0.326679 | 0.221144  |
| N | -3.935822 | -1.604378 | -0.015949 | O | 6.725414  | 0.751850  | -0.376869 |
| C | -3.884168 | -2.679400 | -1.025041 | H | 6.956168  | -2.695616 | -0.927421 |
| C | -2.715568 | -1.515947 | 0.780742  | H | 5.270462  | -3.225961 | -1.098576 |
| H | -2.971354 | -1.476657 | 1.841810  | C | 5.825465  | -1.671834 | -2.516121 |
| C | -1.953453 | -2.801576 | 0.403502  | H | 6.672733  | -0.994855 | -2.666415 |
| C | -1.917405 | -0.270760 | 0.385427  | H | 5.795776  | -2.378816 | -3.347745 |
| O | -1.986021 | 0.187775  | -0.766226 | H | 4.561357  | 0.054325  | -2.992010 |
| H | -0.870450 | -2.682260 | 0.495570  | H | 3.660265  | -1.455416 | -2.718519 |
| H | -2.272024 | -3.610922 | 1.067856  | N | 7.393045  | -0.705436 | 1.220233  |
| C | -2.407502 | -3.072120 | -1.034499 | C | 7.451608  | -2.055288 | 1.773439  |
| H | -1.856831 | -2.431943 | -1.730744 | C | 8.568190  | 0.119097  | 1.487546  |
| H | -2.263949 | -4.112847 | -1.332774 | H | 9.335013  | -0.033280 | 0.719131  |
| H | -4.227449 | -2.320685 | -1.997178 | H | 8.293737  | 1.173829  | 1.512340  |
| H | -4.520906 | -3.513370 | -0.709636 | H | 8.974874  | -0.167809 | 2.458387  |
| N | -1.133996 | 0.264309  | 1.333496  | H | 7.624909  | -1.986462 | 2.849995  |
| C | -0.830731 | -0.372531 | 2.632643  | H | 6.524232  | -2.600383 | 1.611612  |
| C | -0.242825 | 1.398797  | 1.027661  | H | 8.276775  | -2.615271 | 1.318698  |
| C | 0.399328  | 1.663442  | 2.409538  | C | -1.025650 | 2.614253  | 0.505458  |
| C | 0.850039  | 0.880505  | 0.061682  | H | -0.555936 | 3.544582  | 0.831795  |
| O | 0.998900  | -0.340738 | -0.112302 | H | -1.109599 | 2.626146  | -0.582733 |
| H | 1.368753  | 2.161560  | 2.332781  | H | -2.036330 | 2.588450  | 0.923079  |
| H | -0.279490 | 2.311222  | 2.977156  |   |           |           |           |
| C | 0.483190  | 0.281685  | 3.050709  |   |           |           |           |
| H | 1.331530  | -0.276236 | 2.641101  |   |           |           |           |
| H | 0.588708  | 0.324454  | 4.136731  |   |           |           |           |
| H | -0.739564 | -1.455565 | 2.524281  |   |           |           |           |
| H | -1.630887 | -0.154426 | 3.348541  |   |           |           |           |

**Ac-(Hyp-Gly-2-MePro)-(Hyp-Gly-Pro)-  
NMe<sub>2</sub>**

$E = -2191.8392673$  Hartrees

|   |            |           |           |   |           |           |           |
|---|------------|-----------|-----------|---|-----------|-----------|-----------|
| C | -10.224310 | -1.341423 | 0.601447  | O | 0.756958  | 4.674610  | -0.412460 |
| H | -10.952470 | -1.339279 | -0.216843 | H | 1.948187  | 4.757461  | 1.286901  |
| C | -8.837221  | -1.546977 | 0.056289  | H | 3.179825  | 2.724301  | 0.854823  |
| O | -8.187837  | -2.589168 | 0.268848  | H | 3.053516  | 3.418521  | -0.781900 |
| N | -8.316586  | -0.555530 | -0.685680 | O | 2.619309  | 0.046577  | 0.957074  |
| C | -8.974282  | 0.710063  | -1.036219 | N | 2.924738  | 0.022487  | -1.285064 |
| C | -6.963769  | -0.653480 | -1.224299 | H | 1.386402  | 5.183770  | -0.948850 |
| H | -6.915468  | -1.445145 | -1.980751 | H | 2.789736  | 0.522215  | -2.156597 |
| C | -6.730995  | 0.736959  | -1.844776 | C | 3.907867  | -1.029742 | -1.232193 |
| C | -5.942796  | -0.926301 | -0.128959 | H | 3.517361  | -1.879191 | -0.663695 |
| O | -6.039595  | -0.421026 | 0.995977  | H | 4.102300  | -1.374281 | -2.251687 |
| H | -6.308786  | 1.416141  | -1.095598 | C | 5.222736  | -0.557844 | -0.617124 |
| H | -6.061769  | 0.700194  | -2.707466 | O | 5.466597  | 0.644404  | -0.428440 |
| C | -8.139773  | 1.205855  | -2.206632 | N | 6.095334  | -1.522987 | -0.298300 |
| O | -8.621586  | 0.548786  | -3.377390 | C | 5.957588  | -2.954987 | -0.626987 |
| H | -8.205232  | 2.291448  | -2.324230 | C | 7.433928  | -1.174178 | 0.164199  |
| H | -8.929014  | 1.417890  | -0.201114 | C | 7.390343  | -3.478341 | -0.514958 |
| H | -10.016827 | 0.548763  | -1.319128 | H | 5.544027  | -3.085060 | -1.629982 |
| H | -8.040694  | 0.782405  | -4.120053 | H | 5.291695  | -3.437376 | 0.096656  |
| N | -4.906444  | -1.702194 | -0.484059 | H | 7.359088  | -0.512880 | 1.029583  |
| H | -4.836751  | -2.020504 | -1.443769 | C | 8.036321  | -2.546619 | 0.514058  |
| C | -3.765749  | -1.838942 | 0.387340  | C | 8.210738  | -0.475743 | -0.963262 |
| H | -4.080156  | -2.247558 | 1.352537  | H | 7.898158  | -3.382477 | -1.479781 |
| H | -3.068970  | -2.549698 | -0.065460 | H | 7.418044  | -4.526934 | -0.212025 |
| C | -3.046413  | -0.506222 | 0.597643  | H | 9.127774  | -2.551330 | 0.470913  |
| O | -3.268637  | 0.470892  | -0.131629 | H | 7.727145  | -2.817980 | 1.528442  |
| N | -2.177335  | -0.471033 | 1.619011  | O | 7.841452  | -0.599424 | -2.143592 |
| C | -1.701575  | -1.666818 | 2.346868  | N | 9.300902  | 0.227677  | -0.609906 |
| C | -1.345168  | 0.718720  | 1.864549  | C | 9.700422  | 0.458073  | 0.777205  |
| C | -0.555537  | 0.286300  | 3.121140  | C | 10.029889 | 1.006992  | -1.602823 |
| C | -0.342890  | 0.828502  | 0.686976  | H | 9.173401  | 1.318614  | 1.204320  |
| O | -0.222285  | -0.113145 | -0.112387 | H | 9.524765  | -0.420673 | 1.397386  |
| H | 0.383082   | 0.835806  | 3.228152  | H | 10.772365 | 0.665251  | 0.787578  |
| H | -1.179137  | 0.496643  | 3.997890  | H | 11.101428 | 0.819811  | -1.495018 |
| C | -0.368659  | -1.218074 | 2.945518  | H | 9.713519  | 0.723727  | -2.604507 |
| H | 0.448736   | -1.423726 | 2.247224  | H | 9.841371  | 2.075681  | -1.450510 |
| H | -0.154761  | -1.728854 | 3.886701  | C | -2.204661 | 1.961950  | 2.136095  |
| H | -1.585965  | -2.514306 | 1.667160  | H | -1.705311 | 2.624443  | 2.846660  |
| H | -2.421140  | -1.936224 | 3.127574  | H | -2.443500 | 2.522031  | 1.230291  |
| H | -10.302636 | -0.382493 | 1.122682  | H | -3.142825 | 1.633906  | 2.593389  |
| H | -10.460001 | -2.154476 | 1.288588  |   |           |           |           |
| N | 0.474327   | 1.897118  | 0.587802  |   |           |           |           |
| C | 0.497034   | 3.140632  | 1.380504  |   |           |           |           |
| C | 1.609578   | 1.821077  | -0.338546 |   |           |           |           |
| C | 1.483102   | 4.019906  | 0.626185  |   |           |           |           |
| H | 0.845864   | 2.952087  | 2.401605  |   |           |           |           |
| H | -0.481822  | 3.615104  | 1.408586  |   |           |           |           |
| H | 1.263062   | 1.898328  | -1.374566 |   |           |           |           |
| C | 2.484471   | 3.020435  | 0.061430  |   |           |           |           |
| C | 2.406918   | 0.536409  | -0.158457 |   |           |           |           |
